# Supplementary material
Source: publisher figshare collection journal article supplement (https://karger.figshare.com/ndownloader/files/33002819)
Supplement: Supplementary file 1 [file 33002819]

**Supplementary Table A. Distribution of migraine by country**

| **Country** | **N, % (95% CI)** | **% of all headaches** |
| --- | --- | --- |
| Australia | 572, 52.0% (49.0%–54.9%) | 32.2% |
| Turkey | 177, 16.1% (14.0%–18.4%) | 18.0% |
| New Zealand | 108, 9.8% (8.2%–11.7%) | 18.2% |
| Singapore | 106, 9.6% (8.0%–11.5%) | 18.3% |
| United Kingdom | 86, 7.8% (6.4%–9.6%) | 31.2% |
| France | 34, 3.1% (2.2%–4.3%) | 29.6% |
| Belgium | 13, 1.2% (0.7%–2.0%) | 18.6% |
| Romania | 2, 0.2% (0.05%–0.7%) | 2.9% |
| Hong Kong | 2, 0.2% (0.05%–0.7%) | 3.1% |
| Israel | 1, 0.1% (0.01%–0.6%) | 8.3% |
